# Supplementary material for: Sn(IV)porphyrin-Incorporated TiO2 Nanotubes for Visible Light-Active Photocatalysis
Source: MDPI journal article supplement (doi:10.3390/molecules29071612), 2024-04-03
Supplement: s1 [file s1]

**Supplementary Materials**

**Sn(IV) Porphyrin-Incorporated TiO<sub>2</sub> Nanotubes for  
Visible Light-Active Photocatalysis**

Nirmal Kumar Shee, Gi-Seon Lee, and Hee-Joon Kim\*

*Department of Chemistry and Bioscience, Kumoh National Institute of Technology,  
Gumi 39177, Republic of Korea*

## List of contents:

**Table S1.** Band gap energy ( $E_g$ ) calculated from the plots of  $(\alpha h\nu)^2$  versus  $(h\nu)$ , using the Tauc's Plot method.

**Table S2.** Photodegradation efficiency of MB dye using different photocatalysts.

**Figure S1.** Determination of band gap energy of SnP, SnP-TNTs, TNFs, and  $\text{TiO}_2$ .

**Figure S2.** Fluorescence spectra of SnP, and SnP-TNTs in Nujol ( $\lambda_{\text{ex}} = 550 \text{ nm}$ ).

**Figure S3.** XPS spectra of SnP-TNTs and  $\text{TiO}_2$  (P-25). Deconvoluted profiles of the O 1s, Ti 2p, C 1s, and Sn 3d core levels.

**Figure S4.** TGA curves of SnP,  $\text{TiO}_2$  (P-25), TNFs, and SnP-TNTs.

**Figure S5.**  $\text{N}_2$  adsorption-desorption isotherms of SnP-TNTs and TNFs (right); corresponding pore size distribution curve (left).

**Figure S6.** Enlarged FE-SEM and TEM images for SnP-TNTs

**Figure S7.** Energy dispersive X-ray spectroscopy (EDS) elemental maps (C, N, O, Ti, and Sn) of SnP-TNTs derived from TEM analysis.

**Figure S8.** Time-dependent adsorption ratios for MB dye using SnP,  $\text{TiO}_2$  (P-25), SnP-TNTs, and TNFs.

**Figure S9.** Visible light-driven photocatalytic degradation of MB dye in aqueous solution using SnP-TNTs.

**Figure S10.** Comparative kinetics of photocatalytic degradation of MB dye under visible light irradiation using SnP,  $\text{TiO}_2$  (P-25), SnP-TNTs, and TNFs as photocatalysts.

**Figure S11.** Comparison of MB dye degradation in the presence of different SnP-TNTs (SnP concentration relative to  $\text{TiO}_2$  P-25).

**Figure S12.** Cyclability of the composite photocatalyst SnP-TNTs in the degradation of MB dye.

**Figure S13.** TEM of composite photocatalyst SnP-TNTs, before and after the MB dye degradation experiment.

**Figure S14.** Temperature-dependent degradation of MB Dye in the presence of composite photocatalyst SnP-TNTs.

**Figure S15.** Effect of pH on the degradation of MB dye in the presence of composite photocatalyst SnP-TNTs.

**Figure S16.** Effect of initial concentration of MB dye on degradation experiments using 50 mg of composite photocatalyst SnP-TNTs.

**Figure S17.** Photocatalytic degradation of MB dye in aqueous solution by the composite photocatalyst SnP-TNTs with different scavengers under visible light irradiation ( $[\text{Na}_2\text{-EDTA}]_0 = [p\text{-BQ}]_0 = [\text{NaN}_3]_0 = [\text{tBuOH}]_0 = 1\text{mM}$ , pH 7.0, T = 298 K).

**Figure S18.** Photocatalytic activities of SnP-TNTs at different wavelengths for the degradation of MB dye.

**Figure S19.** ESI-MS spectrum (positive ion mode) of the reaction mixture of MB dye with the composite photocatalyst SnP-TNTs after 60 min of visible light irradiation.

**Figure S20.** Possible intermediates in the degradation pathway of MB dye in the presence of composite photocatalyst SnP-TNTs.

**Table S1.** Band gap energy ( $E_g$ ) calculated from the plots of  $(\alpha h\nu)^2$  versus  $(h\nu)$ , using the Tauc's Plot method.

| Sample                                    | Band gap energy (eV) |
|-------------------------------------------|----------------------|
| TiO <sub>2</sub> (P-25)                   | 3.17                 |
| SnP                                       | 2.79                 |
| SnP-TiO <sub>2</sub> nanotubes (SnP-TNTs) | 2.37 and 3.02        |
| TNFs                                      | 3.04                 |

**Table S2.** Photodegradation efficiency of MB dye using different photocatalysts.

| Photocatalysts                                                          | Rate constant (min <sup>-1</sup> ) | References |
|-------------------------------------------------------------------------|------------------------------------|------------|
| Polyaniline                                                             | 0.0181                             | [1]        |
| Polyaniline/ZnO                                                         | 0.0241                             | [1]        |
| CdO                                                                     | 0.0051                             | [2]        |
| CdO/PANI                                                                | 0.0197                             | [2]        |
| Fe <sub>0.01</sub> Ni <sub>0.01</sub> Zn <sub>0.98</sub> O              | 0.0204                             | [3]        |
| Fe <sub>0.01</sub> Ni <sub>0.01</sub> Zn <sub>0.98</sub> O/PANI         | 0.0224                             | [3]        |
| TiO <sub>2</sub> -Fe <sub>3</sub> O <sub>4</sub> -Bentonite             | 0.0324                             | [4]        |
| TiO <sub>2</sub> /rGO                                                   | 0.0045                             | [5]        |
| TiO <sub>2</sub> /rGO/Ag                                                | 0.0170                             | [5]        |
| Nano-Metallic Particles                                                 | 0.0390                             | [6]        |
| P2ABSA/TiO <sub>2</sub>                                                 | 0.0138                             | [7]        |
| TiO <sub>2</sub> / poly-o-phenylenediamine                              | 0.0098                             | [8]        |
| Anatase TiO <sub>2</sub>                                                | 0.0090                             | [9]        |
| TiO <sub>2</sub> /GO <sub>0.4</sub>                                     | 0.0520                             | [9]        |
| TiO <sub>2</sub> NPs                                                    | 0.0180                             | [10]       |
| ZnO/NiFe <sub>2</sub> O <sub>4</sub>                                    | 0.0289                             | [11]       |
| CdS                                                                     | 0.0120                             | [12]       |
| Bi <sub>2</sub> WO <sub>6</sub>                                         | 0.0150                             | [12]       |
| Bi <sub>2</sub> WO <sub>6</sub> -CdS                                    | 0.0220                             | [12]       |
| PVA-assisted Bi <sub>2</sub> WO <sub>6</sub> -CdS                       | 0.0240                             | [12]       |
| Li <sub>0.9</sub> Ta <sub>0.8</sub> W <sub>0.25</sub> O <sub>3</sub>    | 0.0401                             | [13]       |
| Fe <sub>2</sub> O <sub>3</sub> /graphene/CuO                            | 0.0725                             | [14]       |
| PVDF/GO/ZnO                                                             | 0.0220                             | [15]       |
| MoS <sub>2</sub> /TiO <sub>2</sub>                                      | 0.0190                             | [16]       |
| Pristine CeO <sub>2</sub>                                               | 0.0121                             | [17]       |
| rGO(1.0 wt%)-TiO <sub>2</sub>                                           | 0.0762                             | [18]       |
| Fe <sub>2</sub> TiO <sub>5</sub>                                        | 0.0160                             | [19]       |
| MnTiO <sub>3</sub>                                                      | 0.0052                             | [20]       |
| Nitrogen doped SrTiO <sub>3</sub>                                       | 0.0149                             | [21]       |
| Chitosan bi-metal oxide                                                 | 0.0696                             | [22]       |
| Eu <sub>0.5</sub> /Bi <sub>2</sub> SiO <sub>5</sub>                     | 0.0107                             | [23]       |
| CuO/GO                                                                  | 0.0741                             | [24]       |
| ZnO Nanorods                                                            | 0.0060                             | [25]       |
| ZIF-8                                                                   | 0.0056                             | [26]       |
| ZIF-8/NDCQDs                                                            | 0.0103                             | [26]       |
| Peroxymonosulfate/Mn <sub>3</sub> O <sub>4</sub>                        | 0.0050                             | [27]       |
| Au-TiO <sub>2</sub>                                                     | 0.0067                             | [28]       |
| <i>p</i> -CuFe <sub>2</sub> O <sub>4</sub>                              | 0.0071                             | [29]       |
| <i>n</i> -SnO <sub>2</sub> / <i>p</i> -CuFe <sub>2</sub> O <sub>4</sub> | 0.0167                             | [29]       |
| Bi-Fe/TiO <sub>2</sub>                                                  | 0.0120                             | [30]       |
| CS-TiO <sub>2</sub> NPs                                                 | 0.0398                             | [31]       |
| Fe-Co-SiO <sub>2</sub> /H <sub>2</sub> O <sub>2</sub>                   | 0.0630                             | [32]       |
| CuO/CuS/MnO <sub>2</sub>                                                | 0.0220                             | [33]       |
| ZnP-SnP-ZnP triad nanostructure                                         | 0.0280                             | [34]       |
| SnP-Ag MOF                                                              | 0.0200                             | [35]       |
| SnP                                                                     | 0.0011                             | this study |
| TiO <sub>2</sub> (P-25)                                                 | 0.0034                             | this study |
| TNFs                                                                    | 0.0067                             | this study |
| SnP-TNTs                                                                | 0.0277                             | this study |

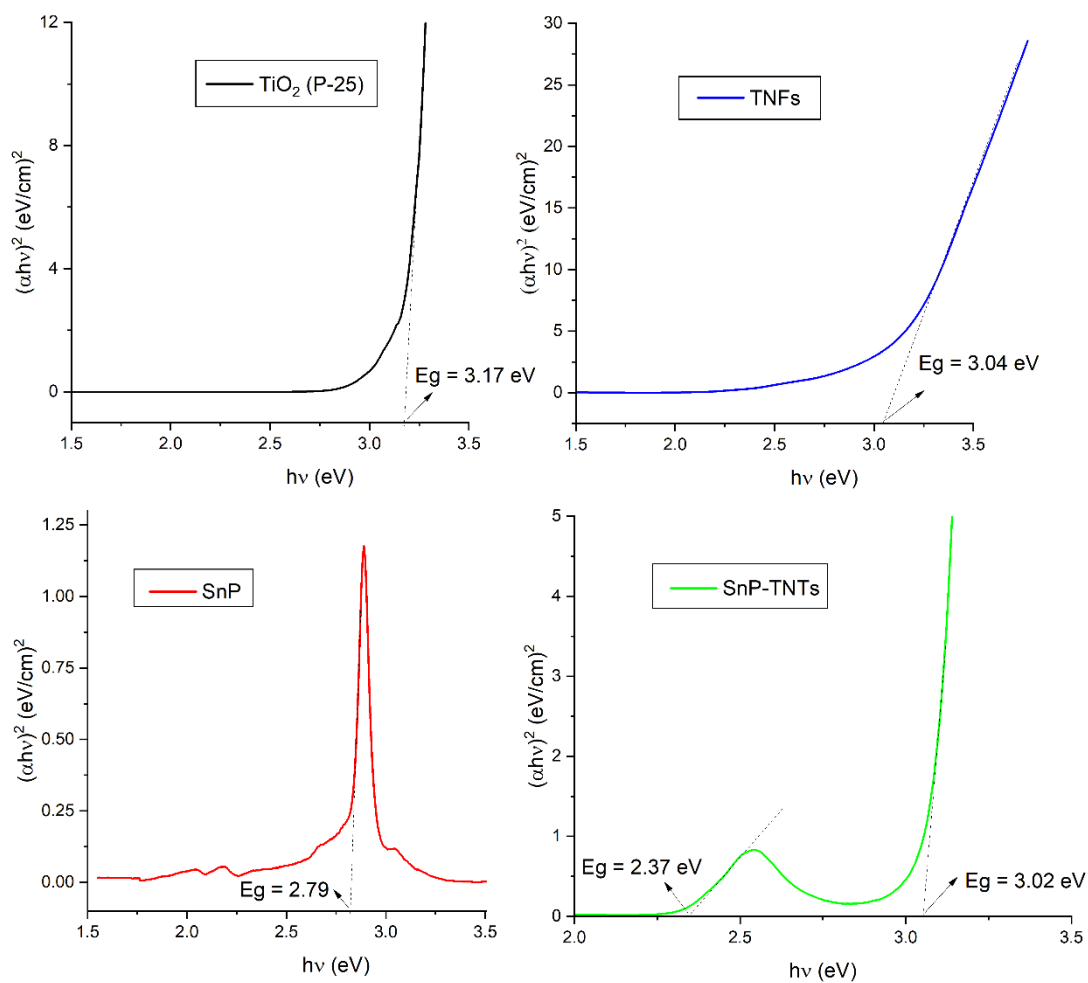

**Figure S1.** Determination of band gap energy of SnP, SnP-TNTs, TNFs, and  $\text{TiO}_2$ .

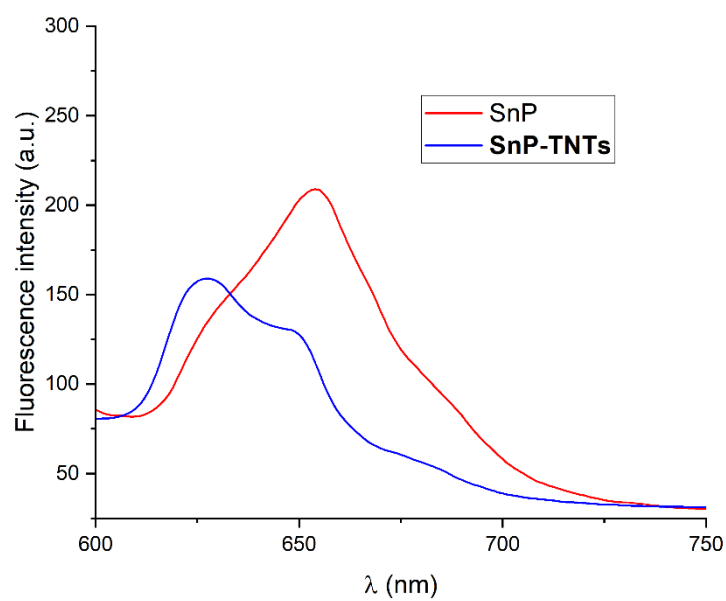

**Figure S2.** Fluorescence spectra of SnP and SnP-TNTs in Nujol ( $\lambda_{\text{ex}} = 550$  nm).

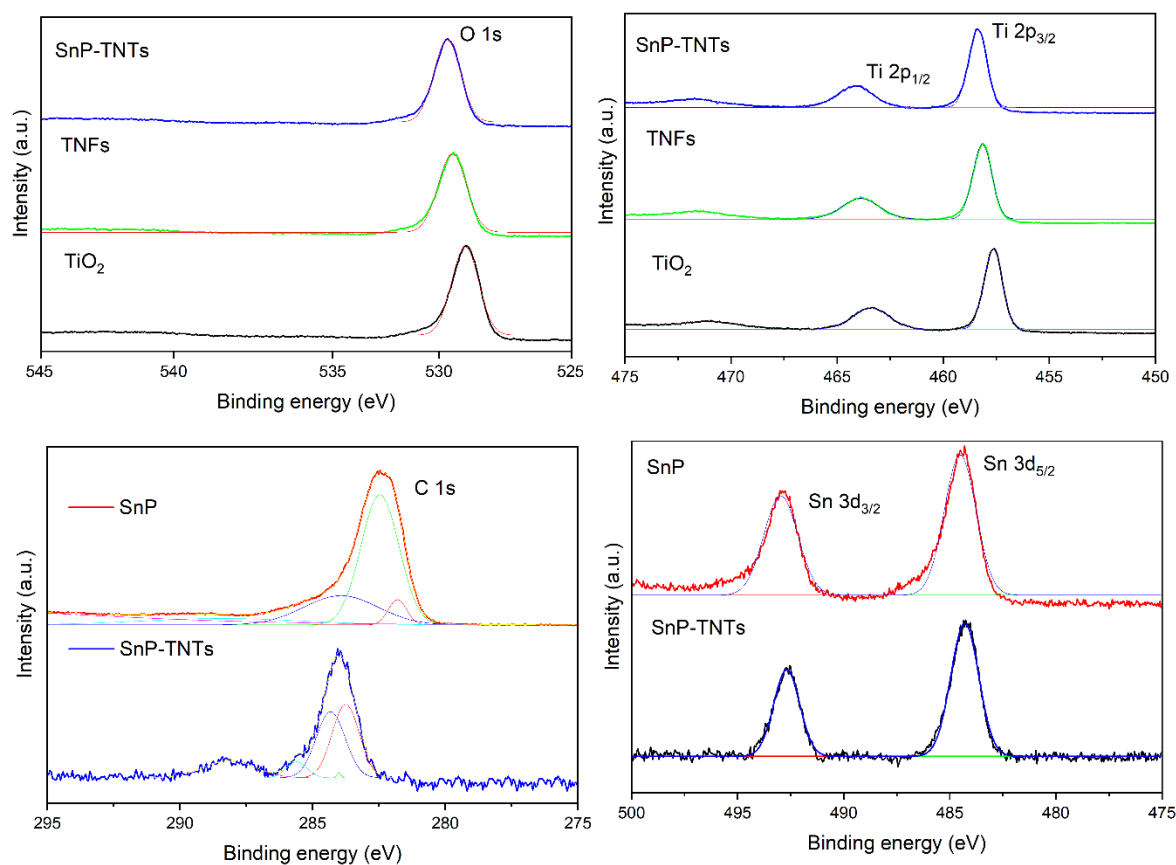

**Figure S3.** XPS spectra of SnP-TNTs and  $\text{TiO}_2$  (P-25). Deconvoluted profiles of the O 1s, Ti 2p, C 1s, and Sn 3d core levels.

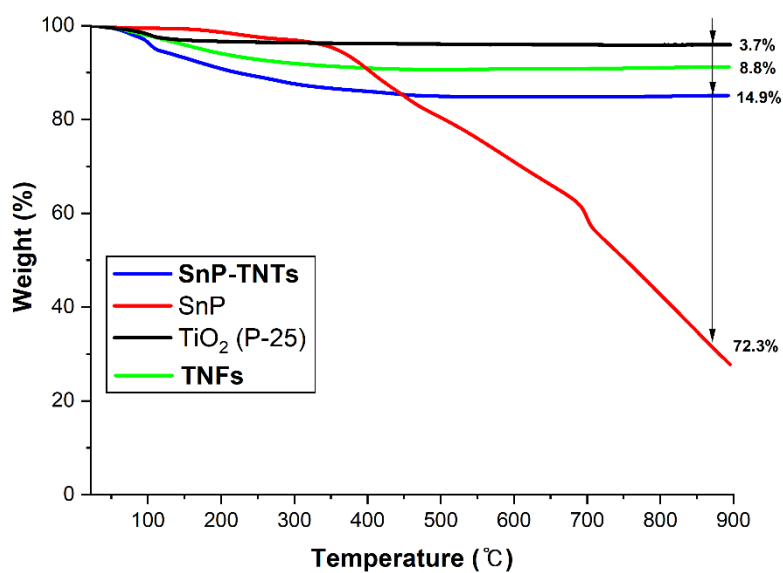

**Figure S4.** TGA curves of SnP,  $\text{TiO}_2$  (P-25), TNFs, and SnP-TNTs.

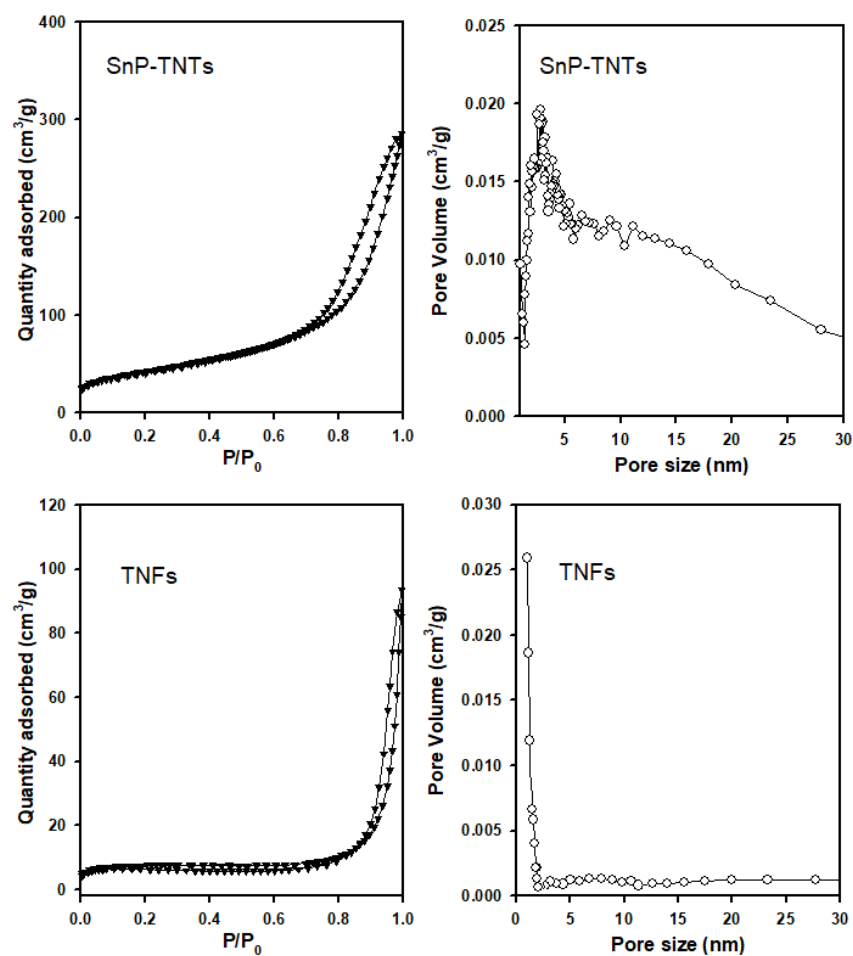

**Figure S5.** N<sub>2</sub> adsorption-desorption isotherms of SnP-TNTs and TNFs (right); corresponding pore size distribution curve (left).

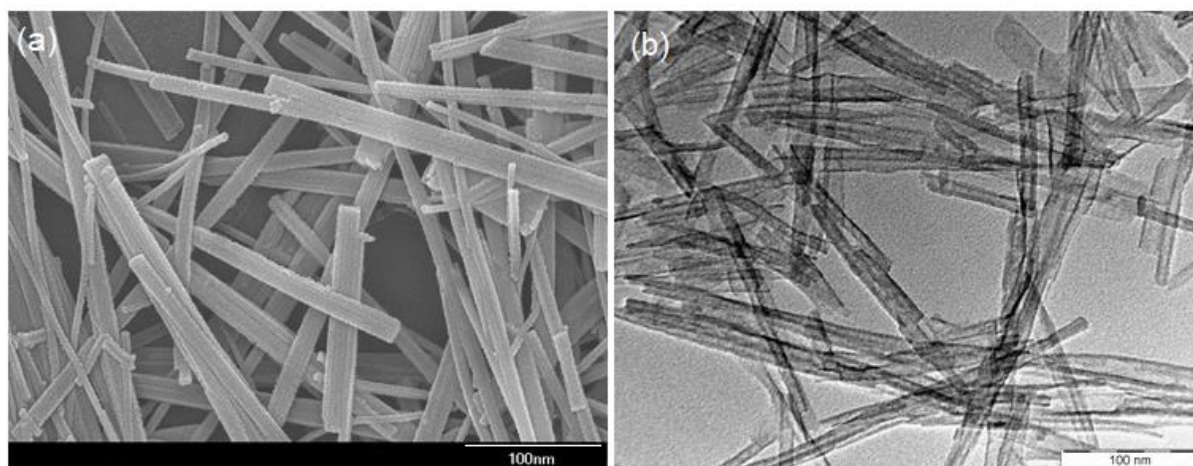

**Figure S6.** Enlarged FE-SEM and TEM images for SnP-TNTs.



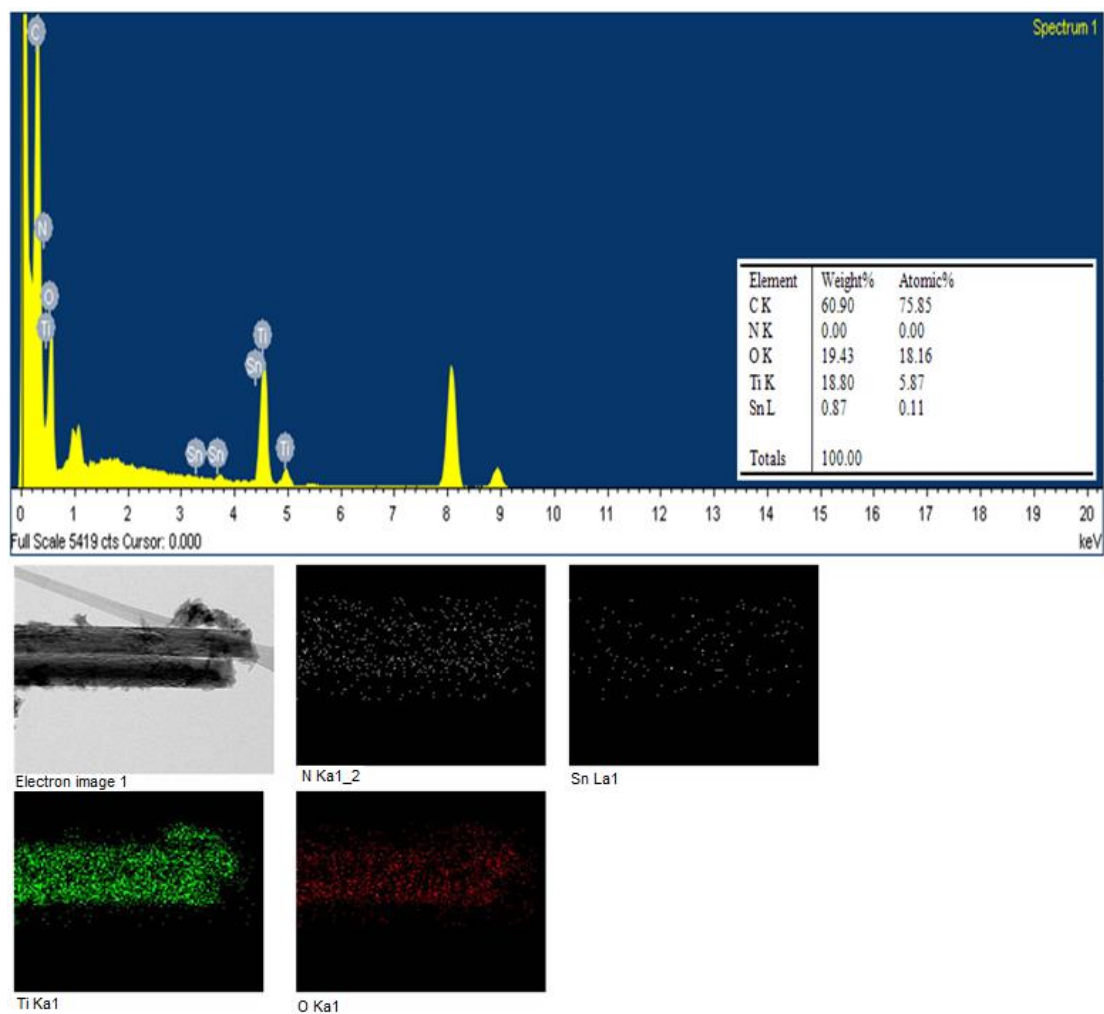

**Figure S7.** Energy dispersive X-ray spectroscopy (EDS) elemental maps (C, N, O, Ti, and Sn) of SnP-TNTs derived from TEM analysis.

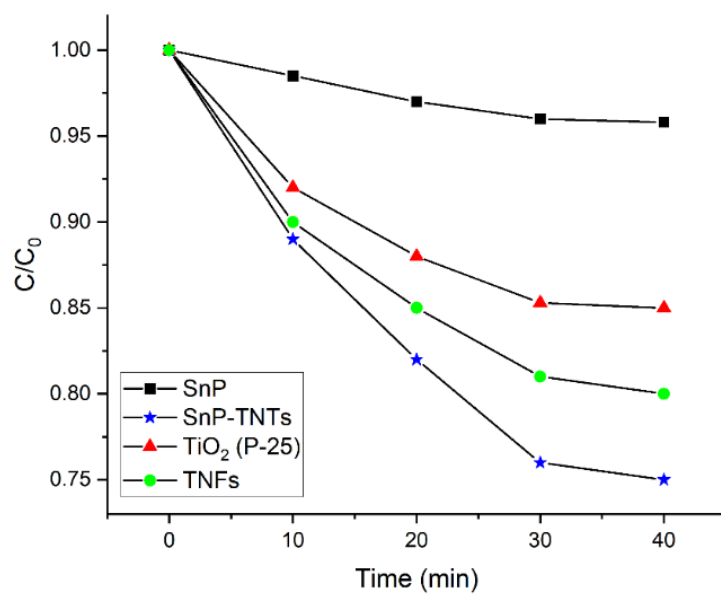

**Figure S8.** Time-dependent adsorption ratios for MB dye using SnP, TiO<sub>2</sub> (P-25), SnP-TNTs, and TNFs.

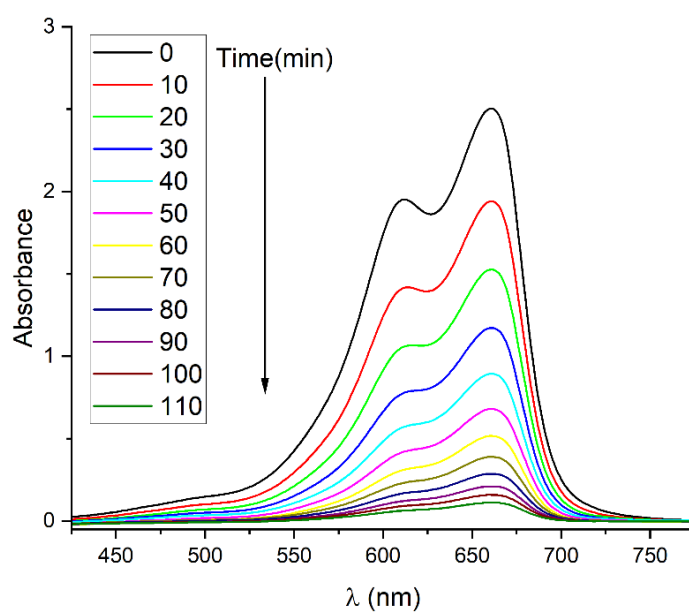

**Figure S9.** Visible light-driven photocatalytic degradation of MB dye in aqueous solution using SnP-TNTs.

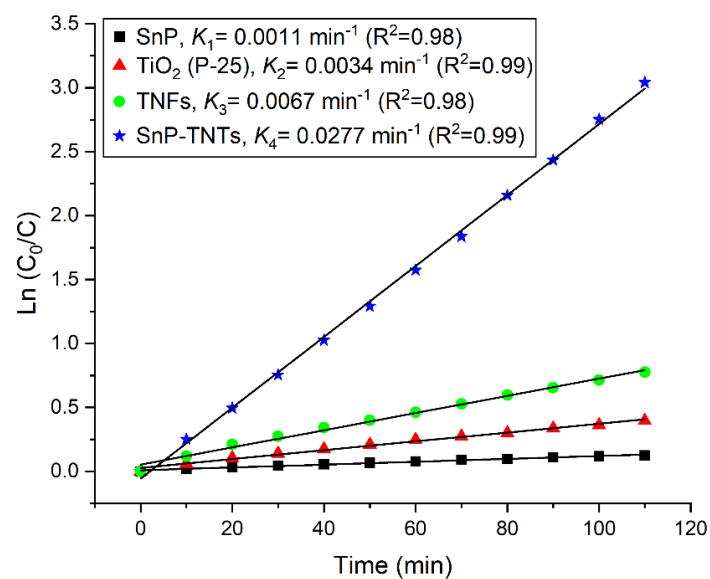

**Figure S10.** Comparative kinetics of photocatalytic degradation of MB dye under visible light irradiation using SnP,  $\text{TiO}_2$  (P-25), SnP-TNTs, and TNFs as photocatalysts.

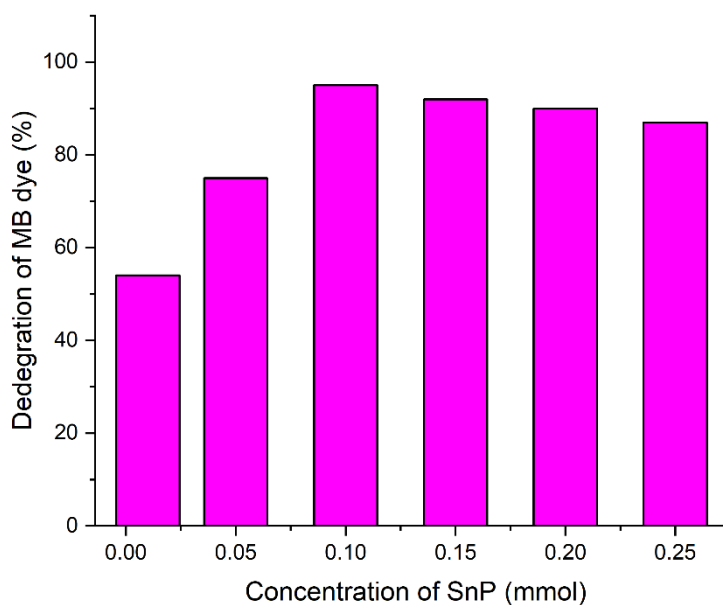

**Figure S11.** Comparison of MB dye degradation in the presence of different SnP-TNTs (SnP concentration relative to  $\text{TiO}_2$  P-25).

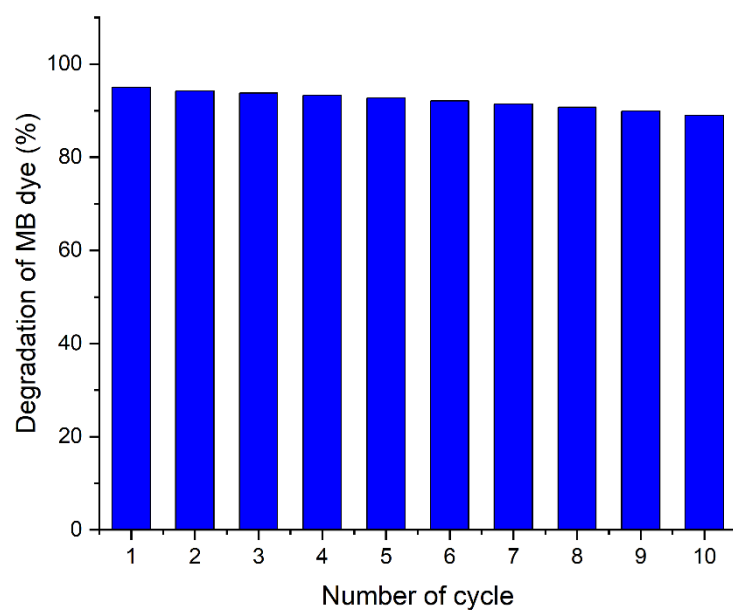

**Figure S12.** Cyclability of the composite photocatalyst SnP-TNTs in the degradation of MB dye.

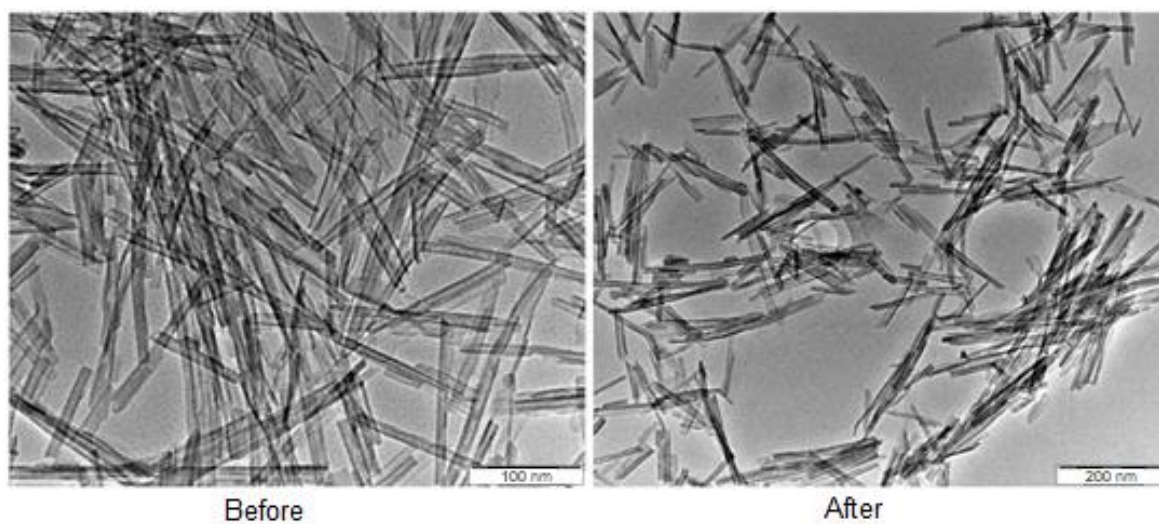

**Figure S13.** TEM of composite photocatalyst SnP-TNTs, before and after the MB dye degradation experiment.

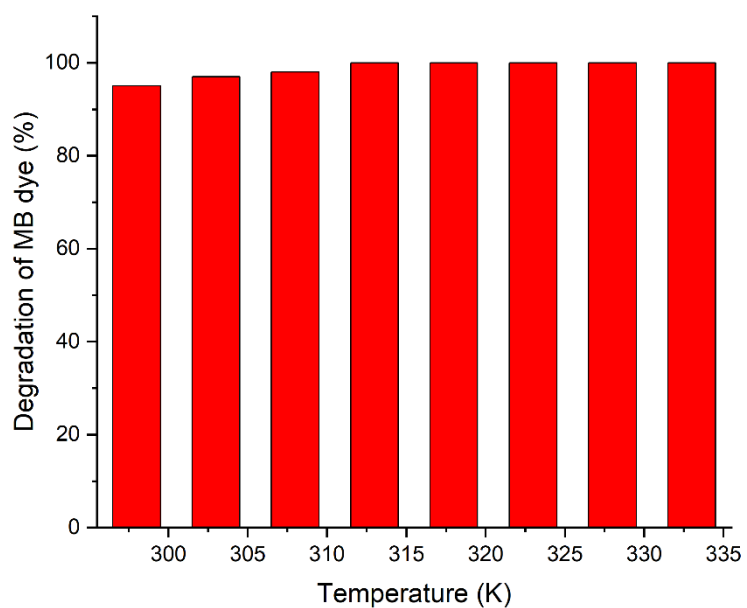

**Figure S14.** Temperature-dependent degradation of MB Dye in the presence of composite photocatalyst SnP-TNTs.

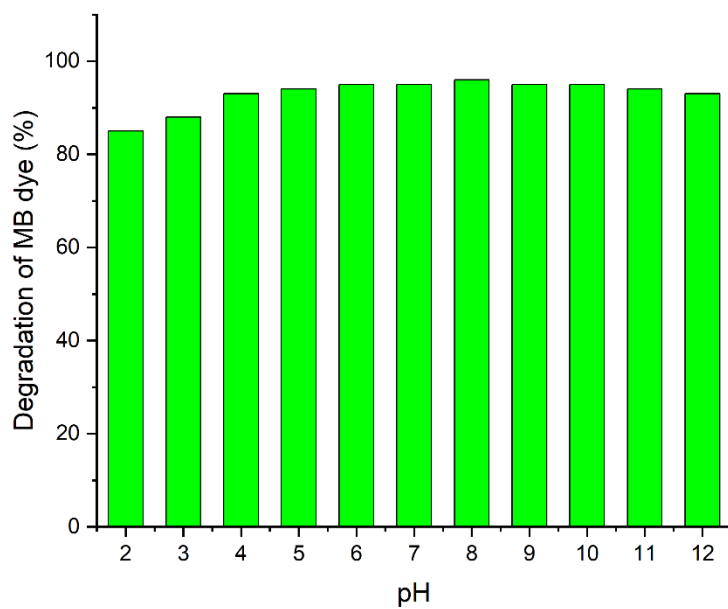

**Figure S15.** Effect of pH on the degradation of MB dye in the presence of the composite photocatalyst SnP-TNTs.

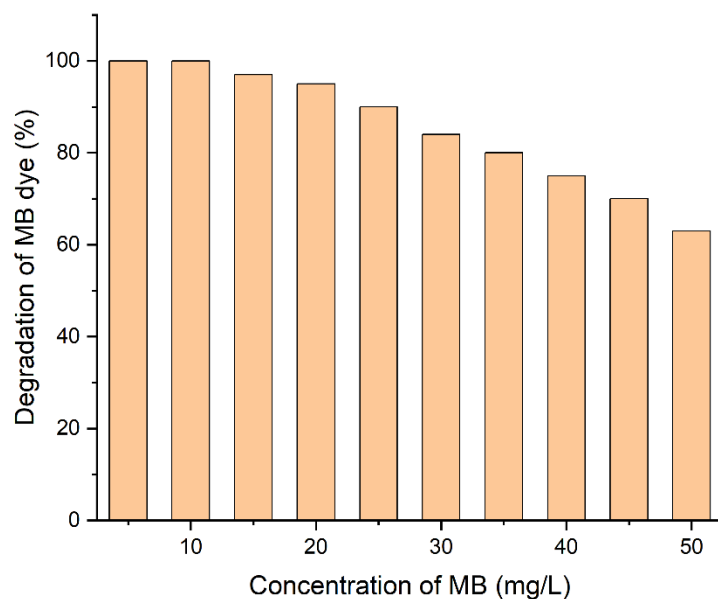

**Figure S16.** Effect of initial concentration of MB dye on degradation experiments using 50 mg of composite photocatalyst SnP-TNTs.

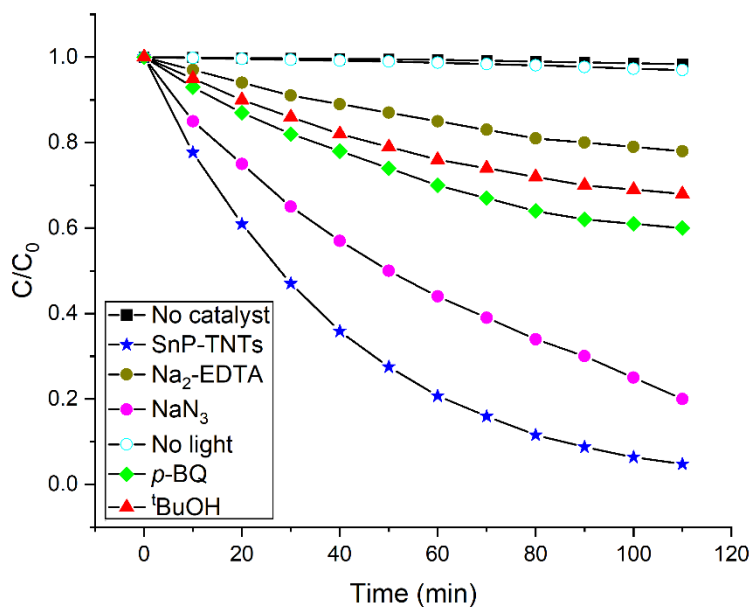

**Figure S17.** Photocatalytic degradation of MB dye in aqueous solution by the composite photocatalyst SnP-TNTs with different scavengers under visible light irradiation ( $[\text{Na}_2\text{-EDTA}]_0 = [p\text{-BQ}]_0 = [\text{NaN}_3]_0 = [^t\text{BuOH}]_0 = 1 \text{ mM}$ , pH 7.0,  $T = 298 \text{ K}$ ).

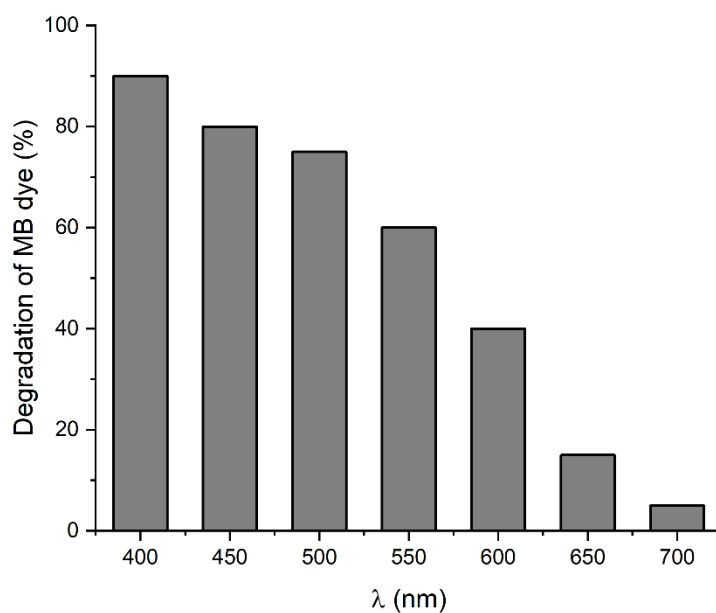

**Figure S18.** Photocatalytic activities of SnP-TNTs at different wavelengths for the degradation of MB dye.

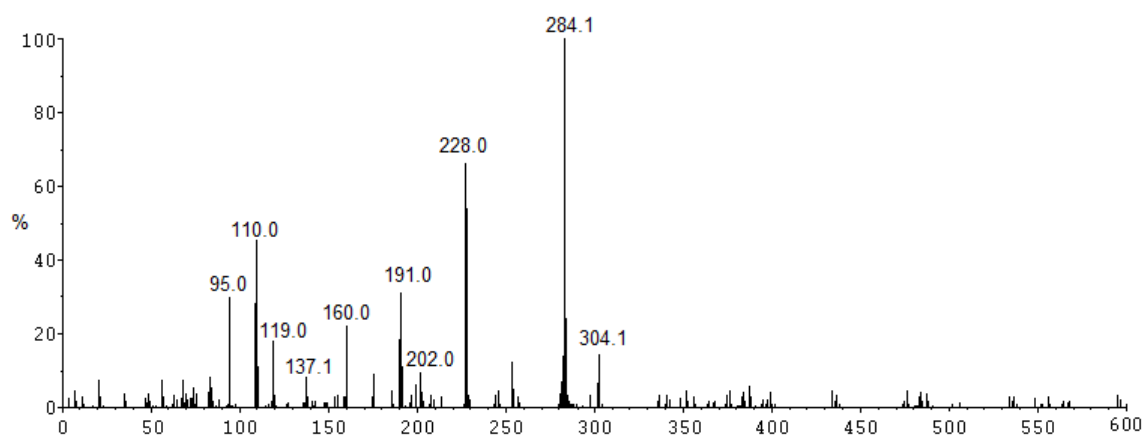

**Figure S19.** ESI-MS spectrum (positive ion mode) of the reaction mixture of MB dye with the composite photocatalyst SnP-TNTs after 60 min of visible light irradiation.





## References

1. Eskizeybek, V.; Sarı, F.; Gülce, H.; Gülce, A.; Avcı, A. Preparation of the new polyaniline/ZnO nanocomposite and its photocatalytic activity for degradation of methylene blue and malachite green dyes under uv and natural sun lights irradiations. *Appl. Catal. B* **2012**, *119*, 197–206.
2. Gülce, H.; Eskizeybek, V.; Haspulat, B.; Sarı, F.; Gülce, A.; Avcı, A. Preparation of a new polyaniline/CdO nanocomposite and investigation of its photocatalytic activity: Comparative study under UV light and natural sunlight irradiation. *Ind. Eng. Chem. Res.* **2013**, *52*, 10924–10934.
3. Kant, S.; Kalia, S.; Kumar, A. A novel nanocomposite of polyaniline and a novel nanocomposite of polyaniline and  $\text{Fe}_{0.01}\text{Ni}_{0.01}\text{Zn}_{0.98}\text{O}$ : Photocatalytic, electrical and antibacterial properties. *J. Alloy. Compd.* **2013**, *578*, 249–256.
4. Chen, W.; Xiao, H.; Xu, H.; Ding, T.; Gu, Y. Photodegradation of Methylene Blue by  $\text{TiO}_2\text{-Fe}_3\text{O}_4\text{-Bentonite}$  Magnetic Nanocomposite. *Int. J. Photoenergy* **2015**, *2015*, 591428.
5. Tian, H.; Wan, C.; Xue, X.; Hu, X.; Wang, X. Effective Electron Transfer Pathway of the Ternary  $\text{TiO}_2\text{/RGO/Ag}$  Nanocomposite with Enhanced Photocatalytic Activity under Visible Light. *Catalysts* **2017**, *7*, 156.
6. Singh, J.; Chang, Y.-Y.; Koduru, J.R.; Yang, J.-K. Potential Degradation of Methylene Blue (MB) by Nano-Metallic Particles: A Kinetic Study and Possible Mechanism of MB Degradation. *Environ. Eng. Res.* **2017**, *23*, 1–9.
6. Yang, C.; Dong, W.; Cui, G.; Zhao, Y.; Shi, X.; Xia, X.; Tang, B.; Wang, W. Highly Efficient Photocatalytic Degradation of Methylene Blue by P2ABSA-Modified  $\text{TiO}_2$  Nanocomposite Due to the Photosensitization Synergetic Effect of  $\text{TiO}_2$  and P2ABSA. *RSC Adv.* **2017**, *7*, 23699–23708.
8. Yang, C.; Zhang, M.; Dong, W.; Cui, G.; Ren, Z.; Wang, W. Highly efficient photocatalytic degradation of methylene blue by PoPD/ $\text{TiO}_2$  nanocomposite. *PLoS ONE* **2017**, *12*, e0174104.
9. Ahmad, J.; Sofi, F. A.; Mehraj, O.; Majid, K. Fabrication of highly photocatalytic active anatase  $\text{TiO}_2$ -graphene oxide heterostructures via solid phase ball milling for environmental remediation. *Surf. Interfaces* **2018**, *13*, 186–195.

10. Azeez, F.; Al-Hetlani, E.; Arafa, M.; Abdelmonem, Y.; Abdel Nazeer, A.; Amin, M.; Madkour, M. The effect of surface charge on photocatalytic degradation of methylene blue dye using chargeable titania nanoparticles. *Sci. Rep.* **2018**, *8*, 1–9.
11. Adeleke, J.T.; Theivasanthi, T.; Thiruppathi, M.; Swaminathan, M.; Akomolafe, T.; Alabi, A.B. Photocatalytic degradation of methylene blue by ZnO/NiFe<sub>2</sub>O<sub>4</sub> nanoparticles. *Appl. Surf. Sci.* **2018**, *455*, 195–200.
12. Rajendran, R.; Varadharajan, K.; Jayaraman, V.; Singaram, B.; Jeyaram, J. Photocatalytic degradation of metronidazole and methylene blue by PVA-assisted Bi<sub>2</sub>WO<sub>6</sub>–CdS nanocomposite film under visible light irradiation. *Appl. Nanosci.* **2018**, *8*, 61–78.
13. Benzaouak, A.; Ellouzi, I.; Ouanji, F.; Touach, N.; Kacimi, M.; Ziyad, M.; Mahi, M.El.; Lofti, E.M. Photocatalytic degradation of methylene blue (MB) dye in aqueous solution by ferroelectric Li<sub>1-x</sub>Ta<sub>1-x</sub>W<sub>x</sub>O<sub>3</sub> materials. *Colloids Surfaces A Physicochem. Eng. Asp.*, **2018**, *553*, 586–592.
14. Nuengmatcha, P.; Porrawatkul, P.; Chanthai, S.; Sricharoen, P.; Limchoowong, N. Enhanced photocatalytic degradation of methylene blue using Fe<sub>2</sub>O<sub>3</sub>/graphene/CuO nanocomposites under visible light. *J. Environ. Chem. Eng.* **2019**, *7*, 103438.
15. Zhang, D.; Dai, F.; Zhang, P.; Ana, Z.; Zhao, Y.; Chen, L. The photodegradation of methylene blue in water with PVDF/GO/ZnO composite membrane. *Mater. Sci. Eng. C* **2019**, *96*, 684–692.
16. Motola, M.; Baudys, M.; Zazpe, R.; Krbal, M.; Michalička, J.; Rodriguez-Pereira, J.; Pavlíňák, D.; Přikryl, J.; Hromádka, L.; Sopha, H.; Krysa, J.; Macak, J.M. 2D MoS<sub>2</sub> Nanosheets on 1D Anodic TiO<sub>2</sub> Nanotube Layers: An Efficient Co-Catalyst for Liquid and Gas Phase Photocatalysis. *Nanoscale* **2019**, *11*, 23126–23131.
17. Majumder, D.; Chakraborty, I.; Mandal, K.; Roy, S. Facet-Dependent Photodegradation of Methylene Blue Using Pristine CeO<sub>2</sub> Nanostructures. *ACS Omega* **2019**, *4*, 4243–4251.
18. Singh, N.; Jana, S.; Singh, G.P.; Dey, R.K. Graphene-supported TiO<sub>2</sub>: Study of promotion of charge carrier in photocatalytic water splitting and methylene blue dye degradation. *Adv. Compos. Hybrid. Mater* **2020**, *3*, 127–140.
19. Vasiljevic, Z.Z.; Dojcinovic, M.P.; Vujancevic, J.D.; Jankovic-Castvan, I.; Ognjanovic, M.; Tadic, N.B.; Stojadinovic, S.; Brankovic, G.O.; Nikolic, M.V. Photocatalytic

- degradation of methylene blue under natural sunlight using iron titanate nanoparticles prepared by a modified sol–gel method, *R. Soc. Open Sci.*, **2020**, *7*, 200708.
20. Alkaykh, S.; Mbarek, A.; Ali-Shattle, E.E. Photocatalytic degradation of methylene blue dye in aqueous solution by MnTiO<sub>3</sub> nanoparticles under sunlight irradiation. *Heliyon* **2020**, *6*, e03663.
  21. Rahman, Q.I.; Hasan, H.; Ali, A.; Mehta, S.K.; Raja, M.A.; Ahmad, N.; Khan, A.R.; Muddassir, M. Synthesis and Characterizations of Nitrogen (N) Doped Strontium Titanate (SrTiO<sub>3</sub>) Nanoparticles for Enhanced Visible Light Driven Photocatalytic Degradation. *J. Nanosci. Nanotechnol.* **2020**, *20*, 6475–6481.
  22. Makeswari, M.; Saraswathi, P. Photo catalytic degradation of methylene blue and methyl orange from aqueous solution using solar light onto chitosan bi-metal oxide composite. *SN Appl. Sci.* **2020**, *2*, 336.
  23. Sarkar, D.; Ganguli, S.; Praveen, A.E.; Mahalingam, V. Defect induced “super mop” like behavior of Eu<sup>3+</sup>-doped hierarchical Bi<sub>2</sub>SiO<sub>5</sub> nanoparticles for improved catalytic and adsorptive behaviour. *Mater. Adv.*, **2020**, *1*, 2019–2032.
  24. Ahmed, M.K.; El-Naggar, M.E.; Aldalbahi, A.; El-Newehy, M.H.; Menazea, A.A. Methylene Blue Degradation under Visible Light of Metallic Nanoparticles Scattered into Graphene Oxide Using Laser Ablation Technique in Aqueous Solutions. *J. Mol. Liq.* **2020**, *315*, 113794.
  25. Ghoniem, M.G.; Talab, S.A.; Modwi, A.K.; Taha, K.K. Exploration of Methylene Blue Degradation over ZnO Nanorods Mechanism using Scavenging Reagents. *Orient J. Chem.*, **2021**, *37*, 609–618.
  26. Abd El Khalk, A. A.; Betiha, M. A.; Mansour, A. S.; Abd El Wahed, M. G.; Al-Sabagh, A. M. High Degradation of Methylene Blue Using a New Nanocomposite Based on Zeolitic Imidazolate Framework-8. *ACS Omega* **2021**, *6*, 26210–26220.
  27. Shokoohi, R.; Khazaei, M.; Godini, K.; Azarian, G.; Latifi, Z.; Javadimanesh, L.; Zolghadr Nasab, H. Degradation and Mineralization of Methylene Blue Dye by Peroxymonosulfate/Mn<sub>3</sub>O<sub>4</sub> Nanoparticles Using Central Composite Design: Kinetic Study. *Inorg. Chem. Commun.* **2021**, *127*, 108501.
  28. Arias, M.-C.; Aguilar, C.; Piza, M.; Zarazua, E.; Anguebes, F.; Anguebes, F.; Anguebes, F.; Anguebes, F.; Cordova, V. Removal of the Methylene Blue Dye (MB) with Catalysts of Au-TiO<sub>2</sub>: Kinetic and Degradation Pathway. *Mod. Res. Catal.* **2021**, *10*, 1–14.

29. Duan, K.; Que, T.; Koppala, S.; Balan, R.; Lokesh, B.; Pillai, R.; David, S.; Karthikeyan, P.; Ramamoorthy, S.; Lekshmi, I. A facile route to synthesize n-SnO<sub>2</sub>/p-CuFe<sub>2</sub>O<sub>4</sub> to rapidly degrade toxic methylene blue dye under natural sunlight. *RSC Adv.*, **2022**, *12*, 16544–16553.
30. Mishra, S.; Chakinala, N.; Chakinala, A.G.; Surolia, P.K. Photocatalytic degradation of methylene blue using monometallic and bimetallic Bi-Fe doped TiO<sub>2</sub>. *Catal. Commun.*, **2022**, *171*, 106518.
31. BinSabt, M.; Sagar, V.; Singh, J.; Rawat, M.; Shaban, M. Green Synthesis of CS-TiO<sub>2</sub> NPs for Efficient Photocatalytic Degradation of Methylene Blue Dye. *Polymers* **2022**, *14*, 2677.
32. Quiton, K.G.N.; Lu, M.-C.; Huang, Y.-H. Synergistic degradation of methylene blue by novel Fe-Co bimetallic catalyst supported on waste silica in photo-Fenton-like system. *Sustain. Environ. Res.*, **2022**, *32*, 21.
33. Abdullah, M.; John, P.; Ashiq, M.N.; Manzoor, S.; Ghor, M. I.; Nisa, M.U.; Abid, A.G.; Butt, K.Y.; Ahmed, S. Development of CuO/CuS/MnO<sub>2</sub> ternary nanocomposite for visible light-induced photocatalytic degradation of methylene blue, *Nanotechnol. Environ. Eng.* **2022**, *1*, 1–11.
34. Shee, N.K.; Kim, M.K.; Kim, H.-J. Supramolecular Porphyrin Nanostructures Based on Coordination-Driven Self-Assembly and Their Visible Light Catalytic Degradation of Methylene Blue Dye. *Nanomaterials* **2020**, *10*, 2314.
35. Shee, N.K.; Kim, H.-J. Coordination framework materials fabricated by the self-assembly of Sn(IV) porphyrins with Ag(I) ions for the photocatalytic degradation of organic dyes in wastewater. *Inorg. Chem. Front.* **2022**, *9*, 1270–1280.
